# Supplementary material for: New biocompatible thermogelling copolymers containing ethylene-butylene segments exhibiting very low gelation concentrations
Source: Royal Society of Chemistry journal article supplement (doi:10.1039/c0sm00764a), 2011-01-01
Supplement: c0sm00764a.pdf [file c0sm00764a.pdf]

**Supporting Information for**

**New Biocompatible Thermogelling Copolymers Containing Ethylene-Butylene Segments Exhibiting Very Low Gelation Concentrations**

*Vu Phuong Nam Nguyen,<sup>a,b,1</sup> Ningyi Kuo,<sup>a,b,1</sup> Xian Jun Loh,<sup>\*a,c</sup>*

<sup>a</sup> Institute of Materials Research and Engineering (IMRE), A\*STAR (Agency for Science, Technology and Research), 3 Research Link, Singapore 117602 (Singapore).

<sup>b</sup> Engineering Science Programme, Faculty of Engineering, National University of Singapore (NUS), 9 Engineering Drive 1, Singapore 117576 (Singapore)

<sup>c</sup> Melville Laboratory for Polymer Synthesis, Department of Chemistry, University of Cambridge, Cambridge, CB2 1EW (UK)

E-mail: XianJun\_Loh@scholars.a-star.edu.sg

### **1. Synthesis of E1**

15 g of PEG, 5 g of PPG and 0.2 g of PEB were dried in a 250-ml two-neck flask at 50 °C under high vacuum overnight. Then, 50 ml of anhydrous 1,2-dichloroethane was added to the flask. Following that, an equimolar of HMDI and four drops of dibutyltin dilaurate ( $\sim 1.6 \times 10^{-2}$  g) were added sequentially. The reaction mixture was stirred at 75 °C under a nitrogen atmosphere for 48 hrs. The resultant copolymer was precipitated in hexane. The copolymers were redissolved in chloroform and precipitated in diethyl ether.

### **2. Synthesis of E2**

Typically, 15 g of PEG, 5 g of PPG and 1 g of PEB were dried in a 250-ml two-neck flask at 50 °C under high vacuum overnight. Then, 50 ml of anhydrous 1,2-dichloroethane was added to the flask. Following that, an equimolar of HMDI and four drops of dibutyltin dilaurate ( $\sim 1.6 \times 10^{-2}$  g) were added sequentially. The reaction mixture was stirred at 75 °C under a nitrogen atmosphere for 48 hrs. The resultant copolymer was precipitated in hexane. The copolymers were redissolved in chloroform and precipitated in diethyl ether.

### **3. Synthesis of E3**

Typically, 10 g of PEG, 10 g of PPG and 0.2 g of PEB were dried in a 250-ml two-neck flask at 50 °C under high vacuum overnight. Then, 50 ml of anhydrous 1,2-dichloroethane was added to the flask. Following that, an equimolar of HMDI and four drops of dibutyltin dilaurate ( $\sim 1.6 \times 10^{-2}$  g) were added sequentially. The reaction mixture was stirred at 75 °C

under a nitrogen atmosphere for 48 hrs. The resultant copolymer was precipitated in hexane. The copolymers were redissolved in chloroform and precipitated in diethyl ether.

#### **4. Synthesis of E4**

Typically, 10 g of PEG, 10 g of PPG and 1 g of PEB were dried in a 250-ml two-neck flask at 50 °C under high vacuum overnight. Then, 50 ml of anhydrous 1,2-dichloroethane was added to the flask. Following that, an equimolar of HMDI and four drops of dibutyltin dilaurate ( $\sim 1.6 \times 10^{-2}$  g) were added sequentially. The reaction mixture was stirred at 75 °C under a nitrogen atmosphere for 48 hrs. The resultant copolymer was precipitated in hexane. The copolymers were redissolved in chloroform and precipitated in diethyl ether.
